# Supplementary material for: Ethanolamine Signaling Promotes Salmonella Niche Recognition and Adaptation during Infection
Source: PubMed Central journal article supplement (PMC4643982; doi:10.1371/journal.ppat.1005278), 2015-11-13
Supplement: ppat.1005278.s012.pdf [file ppat.1005278.s012.pdf]

| <b>Table S1. Bacterial strains and plasmids</b> |                                                                                                      |                                 |                     |
|-------------------------------------------------|------------------------------------------------------------------------------------------------------|---------------------------------|---------------------|
| <b>Designation</b>                              | <b>Genotype and relevant characteristics</b>                                                         | <b>Antibiotic Resistance</b>    | <b>Reference</b>    |
| SL1344                                          | Wild type                                                                                            | Streptomycin                    | [1]                 |
| CJA007                                          | SL1344 $\Delta$ <i>eutR</i> :Chl (chloramphenicol resistance cassette replaces the <i>eutR</i> gene) | Streptomycin<br>Chloramphenicol | Present study       |
| CJA009                                          | SL1344 $\Delta$ <i>eutR</i>                                                                          | Streptomycin                    | Present study       |
| CJA018                                          | SL1344 $\Delta$ <i>eutB</i> :Chl (chloramphenicol resistance cassette replaces the <i>eutB</i> gene) | Streptomycin<br>Chloramphenicol |                     |
| CJA020                                          | SL1344 $\Delta$ <i>eutB</i>                                                                          | Streptomycin                    | Present study       |
| AJK61                                           | SL1344 $\Delta$ <i>invG</i>                                                                          | Streptomycin                    | [2]                 |
| CJA023                                          | SL1344 $\Delta$ <i>invG<math>\Delta</math><i>eutR</i></i>                                            | Streptomycin                    | Present study       |
| CJA028                                          | SL1344 $\Delta$ <i>invG<math>\Delta</math><i>eutB</i></i>                                            | Streptomycin                    | Present study       |
| CJA032                                          | SL1344 $\Delta$ <i>invG<math>\Delta</math><i>eutR</i> + pGEN</i>                                     | Streptomycin<br>Ampicillin      | Present study       |
| CJA033                                          | SL1344 $\Delta$ <i>invG<math>\Delta</math><i>eutR</i> + pCJA002</i>                                  | Streptomycin<br>Ampicillin      | Present study       |
| CJA034                                          | SL1344 $\Delta$ <i>invG</i> + pGEN                                                                   | Streptomycin<br>Ampicillin      | Present study       |
| CJA037                                          | SL1344 $\Delta$ <i>invG</i><br>EutR::FLAG                                                            | Streptomycin                    | Present study       |
| DC26                                            | SL1344 $\Delta$ <i>eutR</i> + pDC24                                                                  | Streptomycin<br>Ampicillin      | Present study       |
| <b>Plasmids</b>                                 |                                                                                                      |                                 |                     |
| pGEN                                            | Cloning vector                                                                                       | Ampicillin                      | [3]                 |
| pMAL-c5X                                        | Cloning vector                                                                                       | Ampicillin                      | New England Biolabs |
| pCJA002                                         | pGEN + <i>eutR</i>                                                                                   | Ampicillin                      | Present study       |
| pDC24                                           | SL1344 <i>eutR</i> in pMAL-c5X                                                                       | Ampicillin                      | Present study       |
| pKD46                                           |                                                                                                      | Ampicillin                      | [4]                 |
| pKD3                                            |                                                                                                      | Chloramphenicol                 | [4]                 |
| pKD4                                            |                                                                                                      | Kanamycin                       | [4]                 |
| pCP20                                           |                                                                                                      | Ampicillin<br>Chloramphenicol   | [4]                 |
| pSUB11                                          |                                                                                                      | Ampicillin                      | [5]                 |

1. Hoiseth SK, Stocker BA (1982) Aromatic-dependent *Salmonella typhimurium* are non-virulent and effective as live vaccines. *Nature* 291: 238-239.
2. Criss AK, Ahlgren DM, Jou TS, McCormick BA, Casanova JE (2001) The GTPase Rac1 selectively regulates *Salmonella* invasion at the apical plasma membrane of polarized epithelial cells. *J Cell Sci* 114: 1331-1341.
3. Lane MC, Alteri CJ, Smith SN, Mobley HLT (2007) Expression of flagella is coincident with uropathogenic *Escherichia coli* ascension to the upper urinary tract. *Proc Natl Acad Sci* 104: 16669-16674.
4. Datsenko KA, Wanner BL (2000) One-step inactivation of chromosomal genes in *Escherichia coli* K-12 using PCR products. *Proc Natl Acad Sci* 97: 6640-6645.
5. Uzzau S, Figueroa-Bossi N, Rubino S, Bossi L (2001) Epitope tagging of chromosomal genes in *Salmonella*. *Proc Natl Acad Sci U S A* 98(26):15264-15269.
