# Supplementary material for: Ethanolamine Signaling Promotes Salmonella Niche Recognition and Adaptation during Infection
Source: PubMed Central journal article supplement (PMC4643982; doi:10.1371/journal.ppat.1005278), 2015-11-13
Supplement: ppat.1005278.s013.pdf [file ppat.1005278.s013.pdf]

**Table S2. Oligonucleotide primers**

| Target gene                    | Purpose                | Sequence                                                                        |
|--------------------------------|------------------------|---------------------------------------------------------------------------------|
| <i>eutR</i>                    | λ-Red                  | 5'-ATCATGAAAAAGACCCGTACAGCGAATTTGCACCATCTTTATCATGAAGCGTGTGTAGGCTGGAGCTGCTTC-3'  |
|                                |                        | 5'-TCAATATCAAGCCCATTTGCCGCATCCGTTGATGCAGCGTCAACGACGTTTTTCATATGAATATCCTCCTTAG-3' |
| <i>eutB</i>                    | λ-Red                  | 5'-GTGACGGTGAAATCACTCGCATTTCCCTCCTGAGGGAACGACTTATGAAAGTGTAGGCTGGAGCTGCTTC-3'    |
|                                |                        | 5'-CCGCGTCATCAGAAGAACAGTGACGGATCGCCCGCCGTTTTGGTCAGACGCATATGAATATCCTCCTTAG-3'    |
| <i>eutR</i>                    | <i>eutR</i> complement | 5'-CTAGAAGCTTTTTATTGGCGCTGCTGGCATCAGTACG-3'                                     |
|                                |                        | 5'-CTAGGGATCCTCAAGCCATTGCCGCATCCGTTGAT-3'                                       |
| <i>eutR</i>                    | qRT-PCR                | 5'-GGGAGGCACCGAGTTTGAA-3'                                                       |
|                                |                        | 5'-GATAACGACGCCAGAATGG-3'                                                       |
| <i>strB</i>                    | qRT-PCR                | 5'-CTACCAGGCGACCGAAATTG-3'                                                      |
|                                |                        | 5'-GTTCCCTCAGATGCGGCATACA-3'                                                    |
| <i>ssrB</i>                    | qRT-PCR/qPCR           | 5'-GGGAAGCTATCCTGGCTGAATT-3'                                                    |
|                                |                        | 5'-CGCGCAAAGTAAGCAGTTGA-3'                                                      |
| <i>ssaB</i><br>( <i>spiC</i> ) | qRT-PCR                | 5'-GGATATCAGGGCCGAAGGTAA-3'                                                     |
|                                |                        | 5'-GCAGGATGCCCATCAATAGTC-3'                                                     |
| <i>sseA</i>                    | qRT-PCR                | 5'-CAGAGAGCCCCAAAAATAGCA-3'                                                     |
|                                |                        | 5'-CTTCTCGGCCTCCTGGTTAA-3'                                                      |
| <i>ssaG</i>                    | qRT-PCR                | 5'-GCCAGGCCATTAATGACAAAA-3'                                                     |
|                                |                        | 5'-TGCGCTTTAATCATCGATTCTG-3'                                                    |
| <i>sifA</i>                    | qRT-PCR                | 5'-GTTGTCTAATGGAACCGATAATATCG-3'                                                |
|                                |                        | 5'-CTACCCCTCCCTTCGACAT-3'                                                       |
| <i>eutR</i>                    | protein expression     | 5'-CCATGGCTAAAAAGACCCGTACAGCGAATTTG-3'                                          |
|                                |                        | 5'-CCTGCAGGAGCCCATTTGCCGCATCCGTTGATG-3'                                         |
| amp                            | Gel shift              | 5'-GGAATTCGAAAGGGCCTCGTGATACGC-3'                                               |
|                                |                        | 5'-CGGGATCCGGTGAGCAAAAACAGGAAGG-3'                                              |
| <i>ssrB</i>                    | Gel shift              | 5'-ATAGCAAGATTTTCCAATCACTG-3'                                                   |
|                                |                        | 5'- ATGATGATTTTCATGATCGTCTAC -3'                                                |
| <i>ssrB</i>                    | qPCR                   | 5'-CATCGCGCTGGAGGAATAA-3'                                                       |
|                                |                        | 5'- GGCCATTGATGCCAGGTAGA -3'                                                    |
| <i>eutS</i>                    | qRT-PCR                | 5'-ACACATCGGTTTTCTCGATAGATTT-3'                                                 |
|                                |                        | 5'-CGCCGACGGTGCCATA-3'                                                          |
| <i>ssrA</i>                    | qRT-PCR                | 5'-GCAATGCAAACCATCCAGGG-3'                                                      |
|                                |                        | 5'-ATTTTACCGGTTCCCGAGT-3'                                                       |
| <i>sipC</i>                    | qRT-PCR                | 5'-GACGGGCGATCTGATTATGAA-3'                                                     |
|                                |                        | 5'-GACGCCCCGCAATACCA-3'                                                         |
| 16sRNA                         | qRT-PCR                | 5'-CCAGCAGCCGCGTAAT -3'                                                         |
|                                |                        | 5'-TTTACGCCAGTAATTCGATT-3'                                                      |
| <i>eutS</i>                    | qPCR                   | 5'-GCTCACCGTCTCCACTGAAA-3'                                                      |
|                                |                        | 5'-ATTCTGGAACCTGTTGCGCT-3'                                                      |
| <i>kan</i>                     | Gel shift              | 5'-CCGGAATTGCCAGCTGGGGCG-3'                                                     |
|                                |                        | 5'-TCTTGTTCAATCATGCCAAACGATCC-3'                                                |
| <i>eutR</i>                    | EutR:FLAG              | 5'-ACCGTCGTTGACGCTGCATCAACGGATGCGGCAATGGGCTGACTACAAAGACCATGACGG-3'              |
|                                |                        | 5'-CACGTTATCAGCAACCGGAGAGCCTCCCCATCAATATCAACATATGAATATCCTCCTTAG-3'              |
